# Supplementary material for: Isolation, Purification and Quantification of Ginsenoside F5 and F3 Isomeric Compounds from Crude Extracts of Flower Buds of Panax ginseng
Source: PubMed Central journal article supplement (PMC6273083; doi:10.3390/molecules21030315), 2016-03-09
Supplement: molecules-21-00315-s001.pdf [file molecules-21-00315-s001.pdf]

# Supplementary Materials: Isolation, Purification and Quantification of Ginsenoside F<sub>5</sub> and F<sub>3</sub> Isomeric Compounds from Crude Extracts of Flower Buds of *Panax ginseng*

Ke-Ke Li, Fei Xu and Xiao-Jie Gong

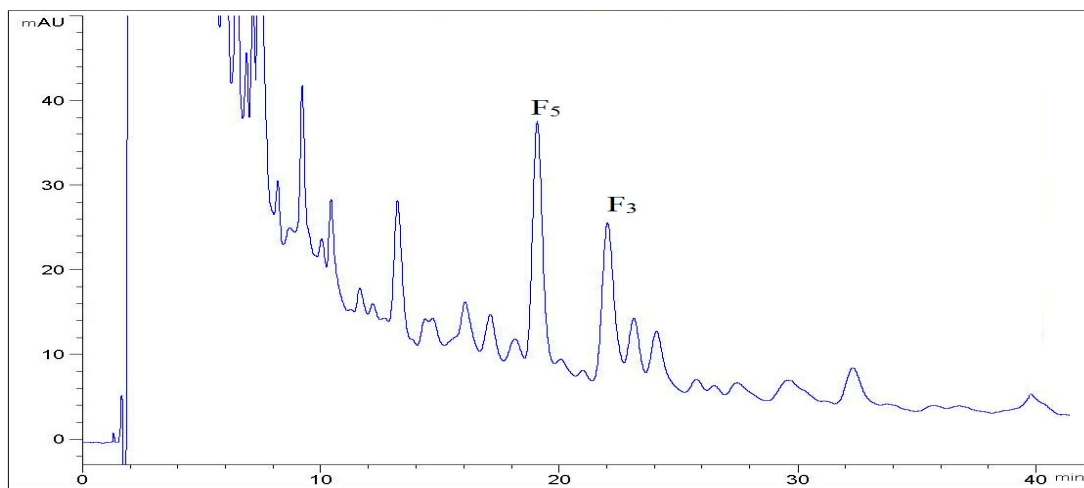

Figure S1. The chromatogram of CEFBPG (acetonitrile–water = 30:70).

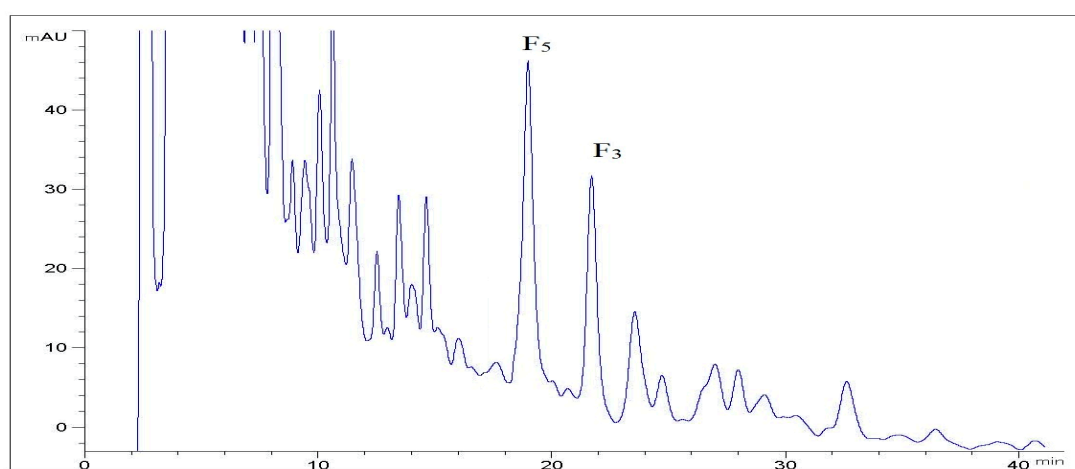

Figure S2. The chromatogram of CEFBPG (acetonitrile–water–phosphoric acid = 30:69:1).

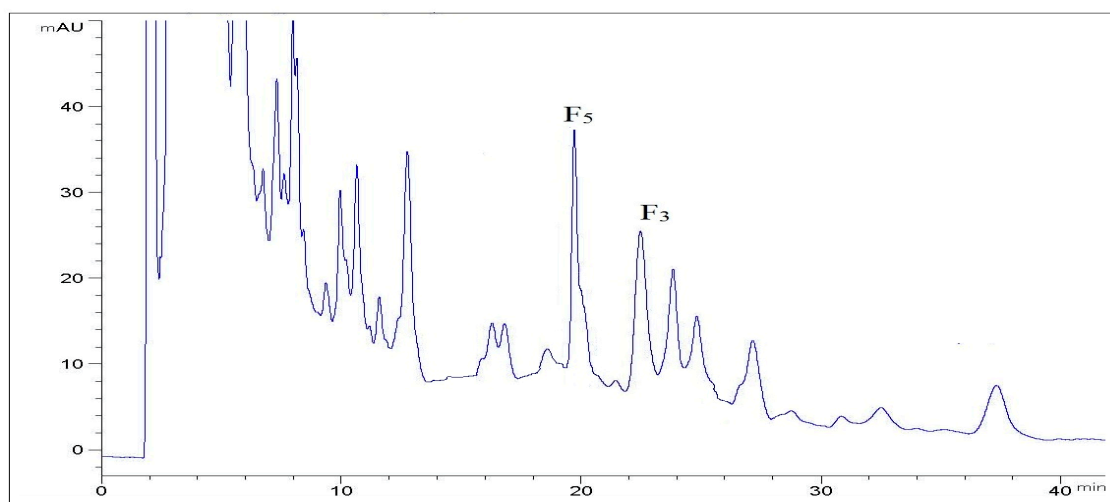

**Figure S3.** The chromatogram of CEFBPG (acetonitrile–water–phosphoric acid = 30:69.5:0.5).

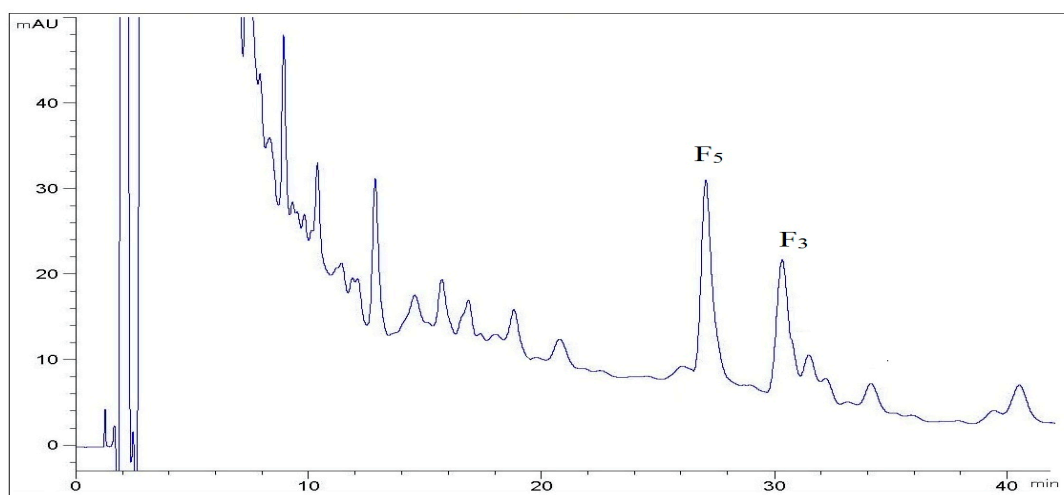

**Figure S4.** The chromatogram of CEFBPG (acetonitrile–water = 28:72).

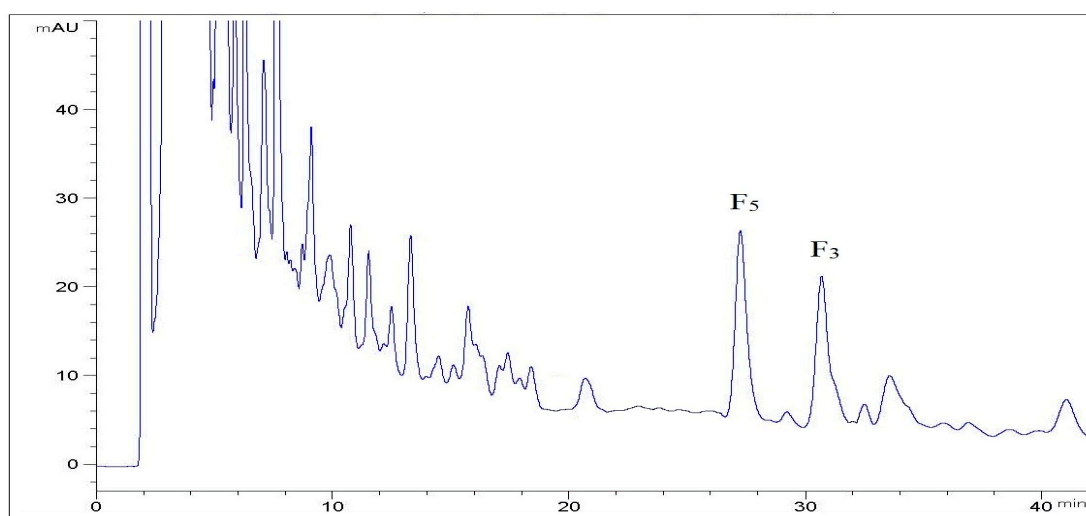

**Figure S5.** The chromatogram of CEFBPG (acetonitrile–water–phosphoric acid = 28:71.5:0.5).

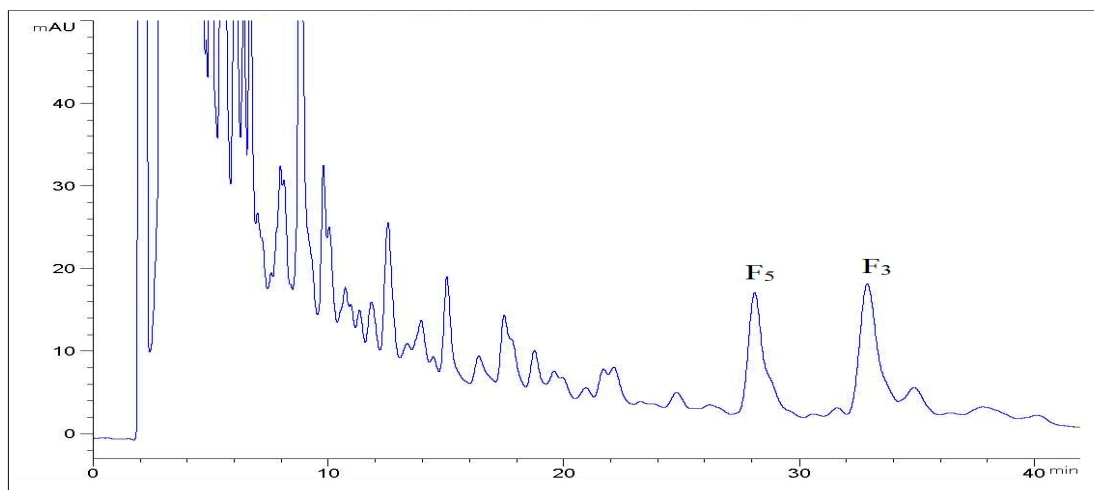

**Figure S6.** The chromatogram of CEFBPG (acetonitrile–water–phosphoric acid = 27:72:1).

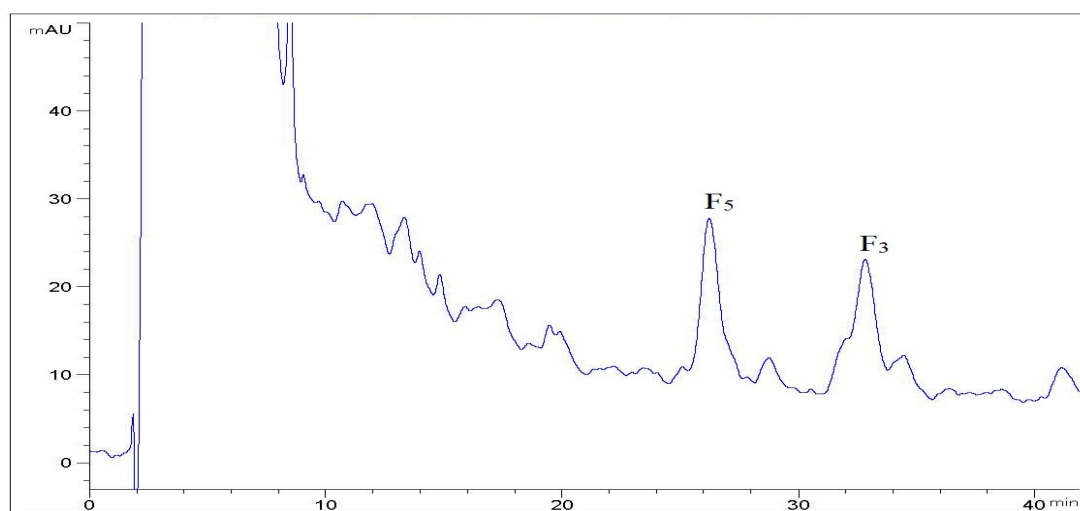

**Figure S7.** The chromatogram of CEFBPG (methanol–water = 60:40).

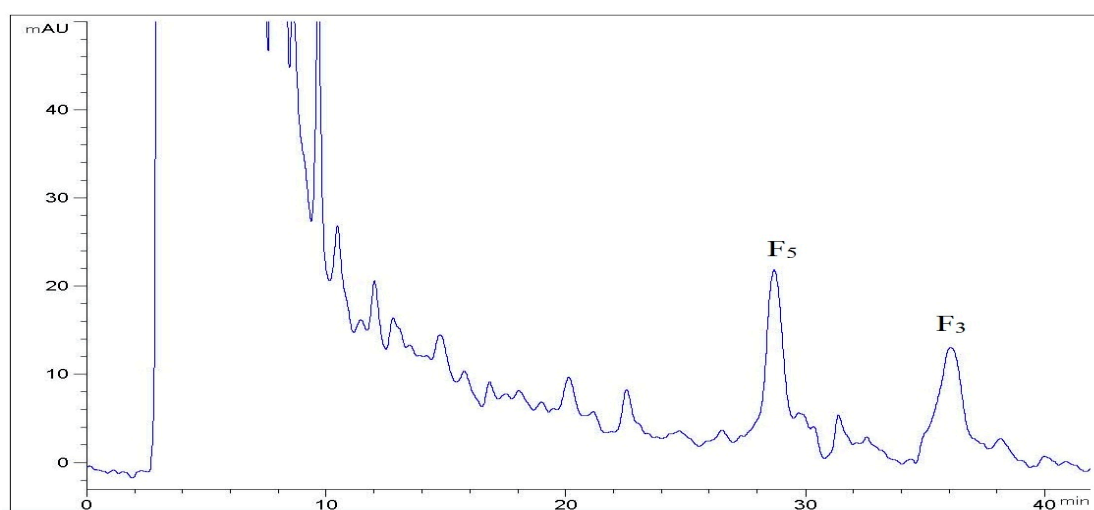

**Figure S8.** The chromatogram of CEFBPG (methanol–water–phosphoric acid = 60:39:1).

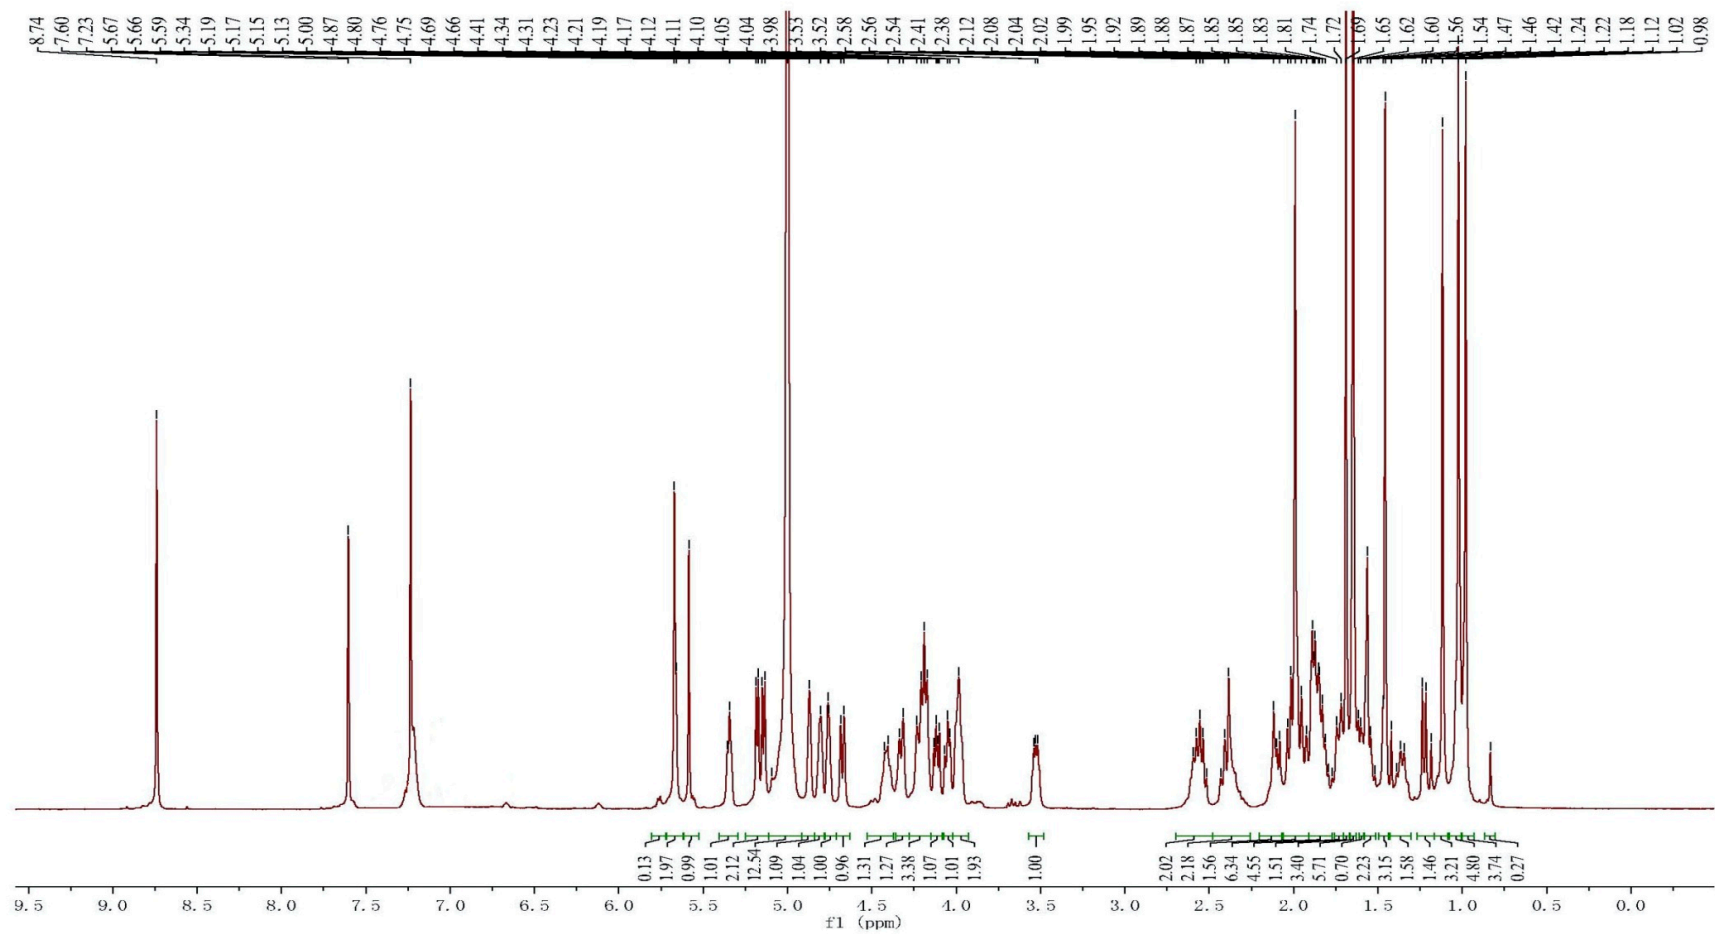

Figure S9. <sup>1</sup>H-NMR spectrum of ginsenoside F5 in pyridine-*d*<sub>5</sub>.

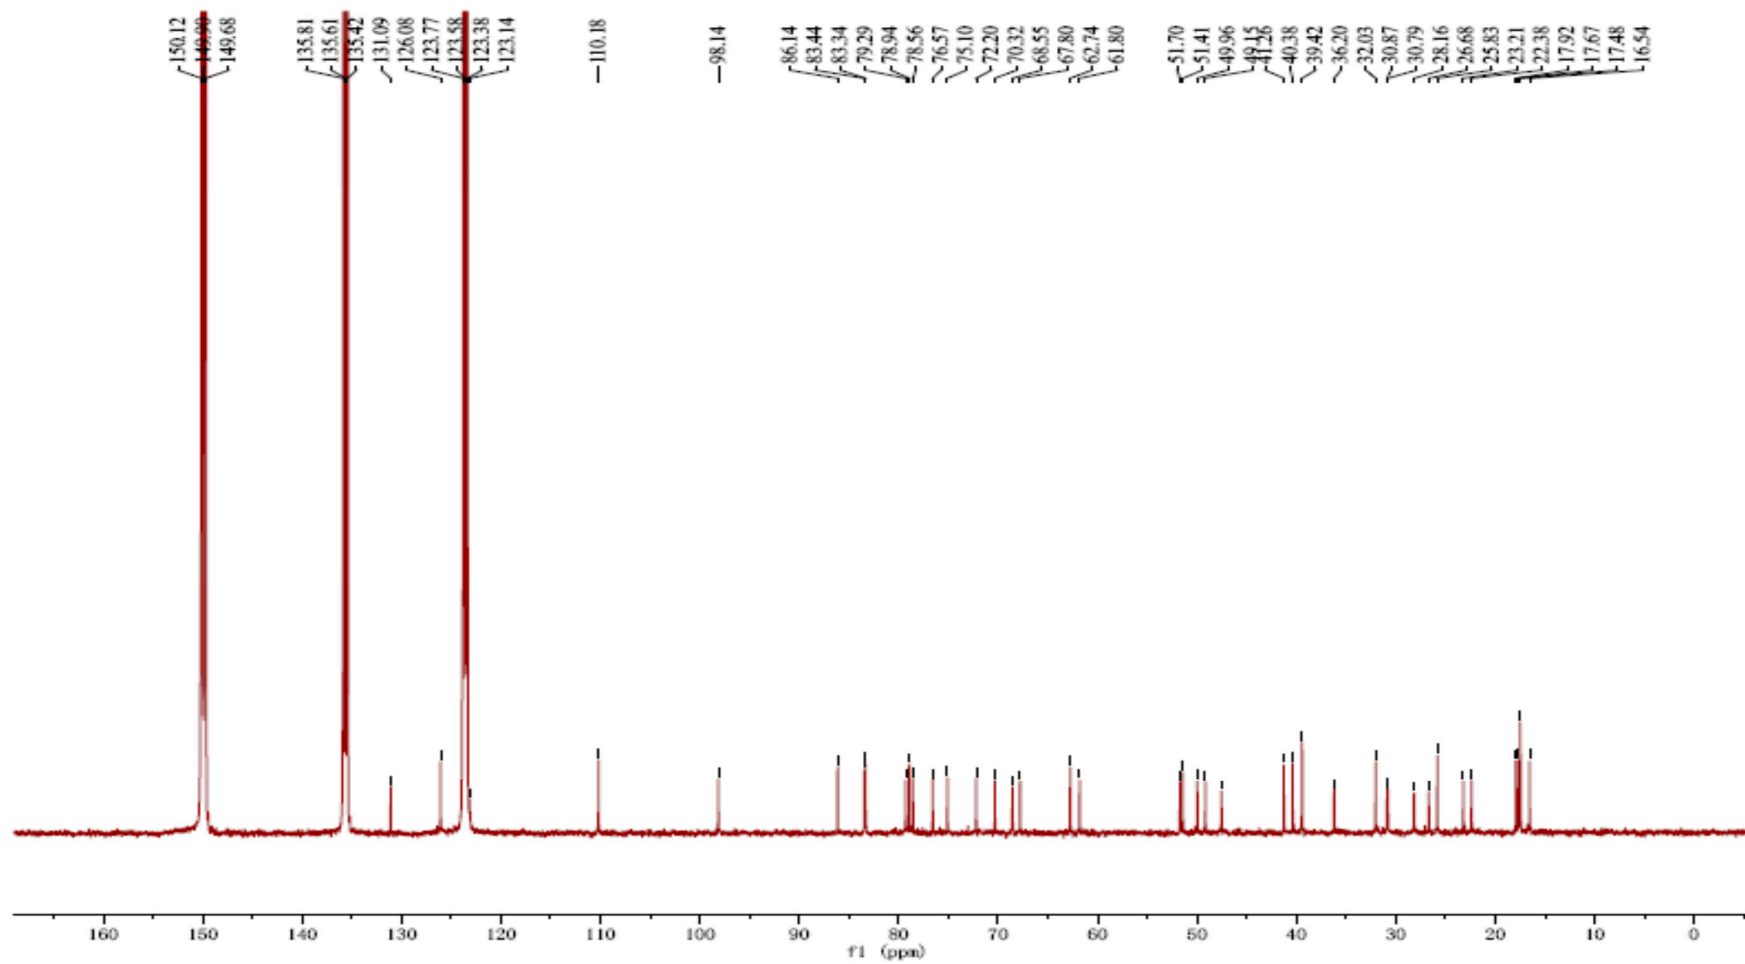

Figure S10. <sup>13</sup>C-NMR spectrum of ginsenoside F<sub>5</sub> in pyridine-*d*<sub>5</sub>.

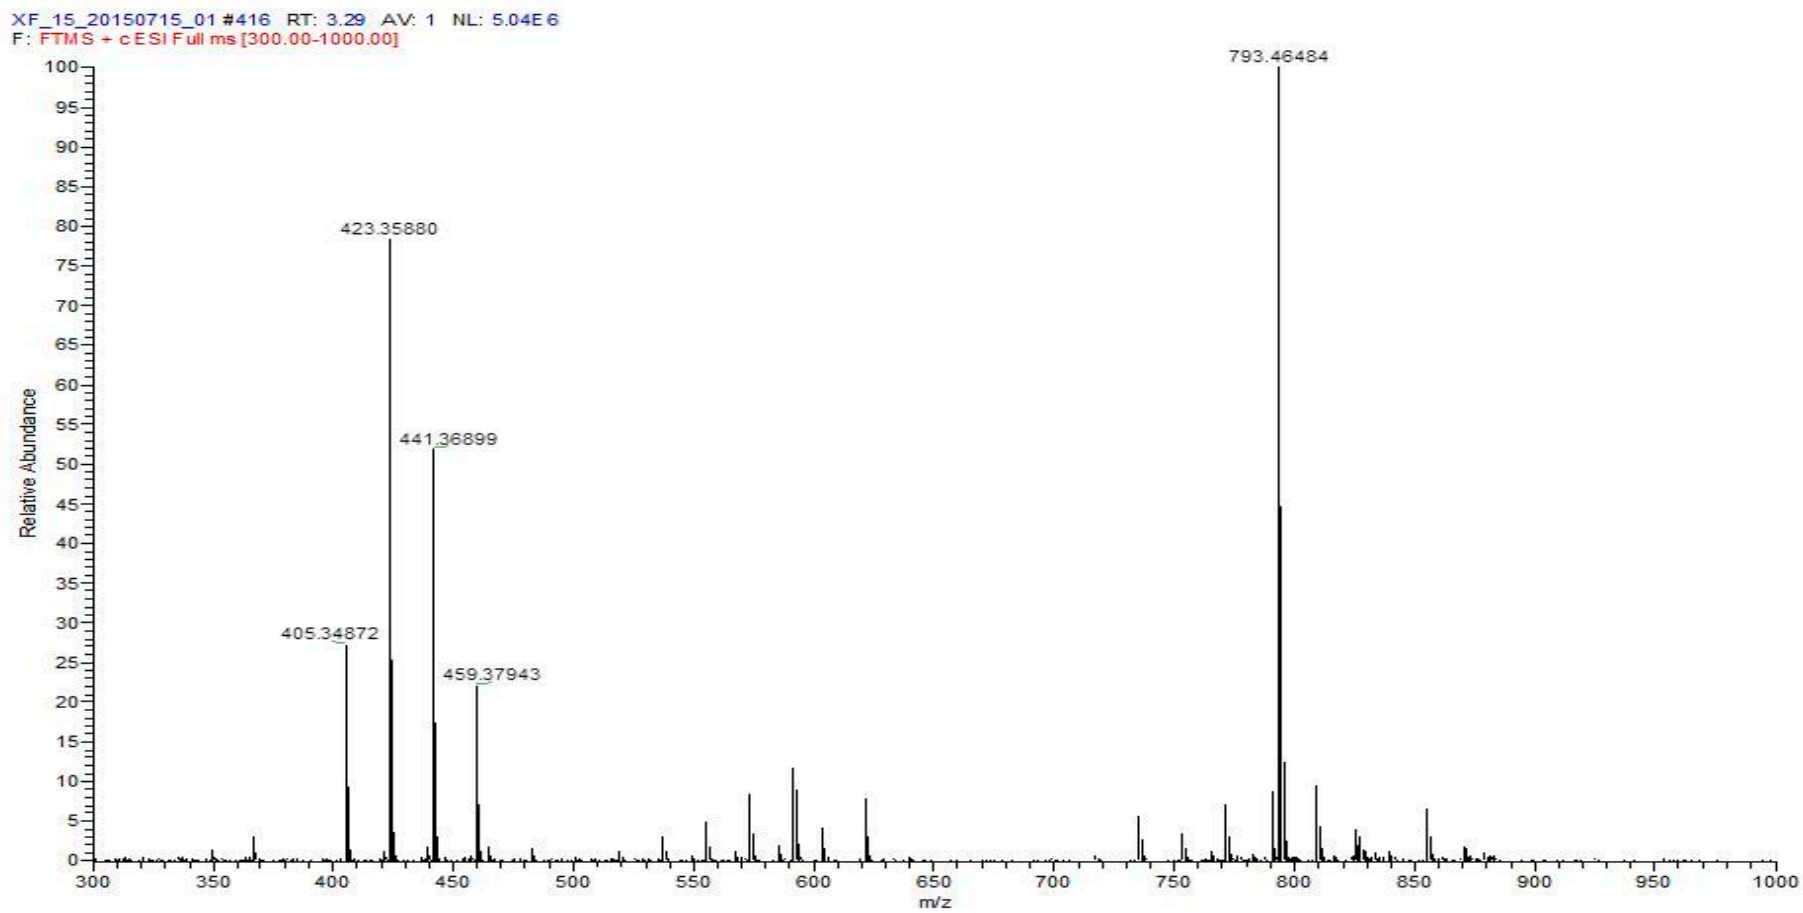

Figure S11. MS spectrum of ginsenoside F5.

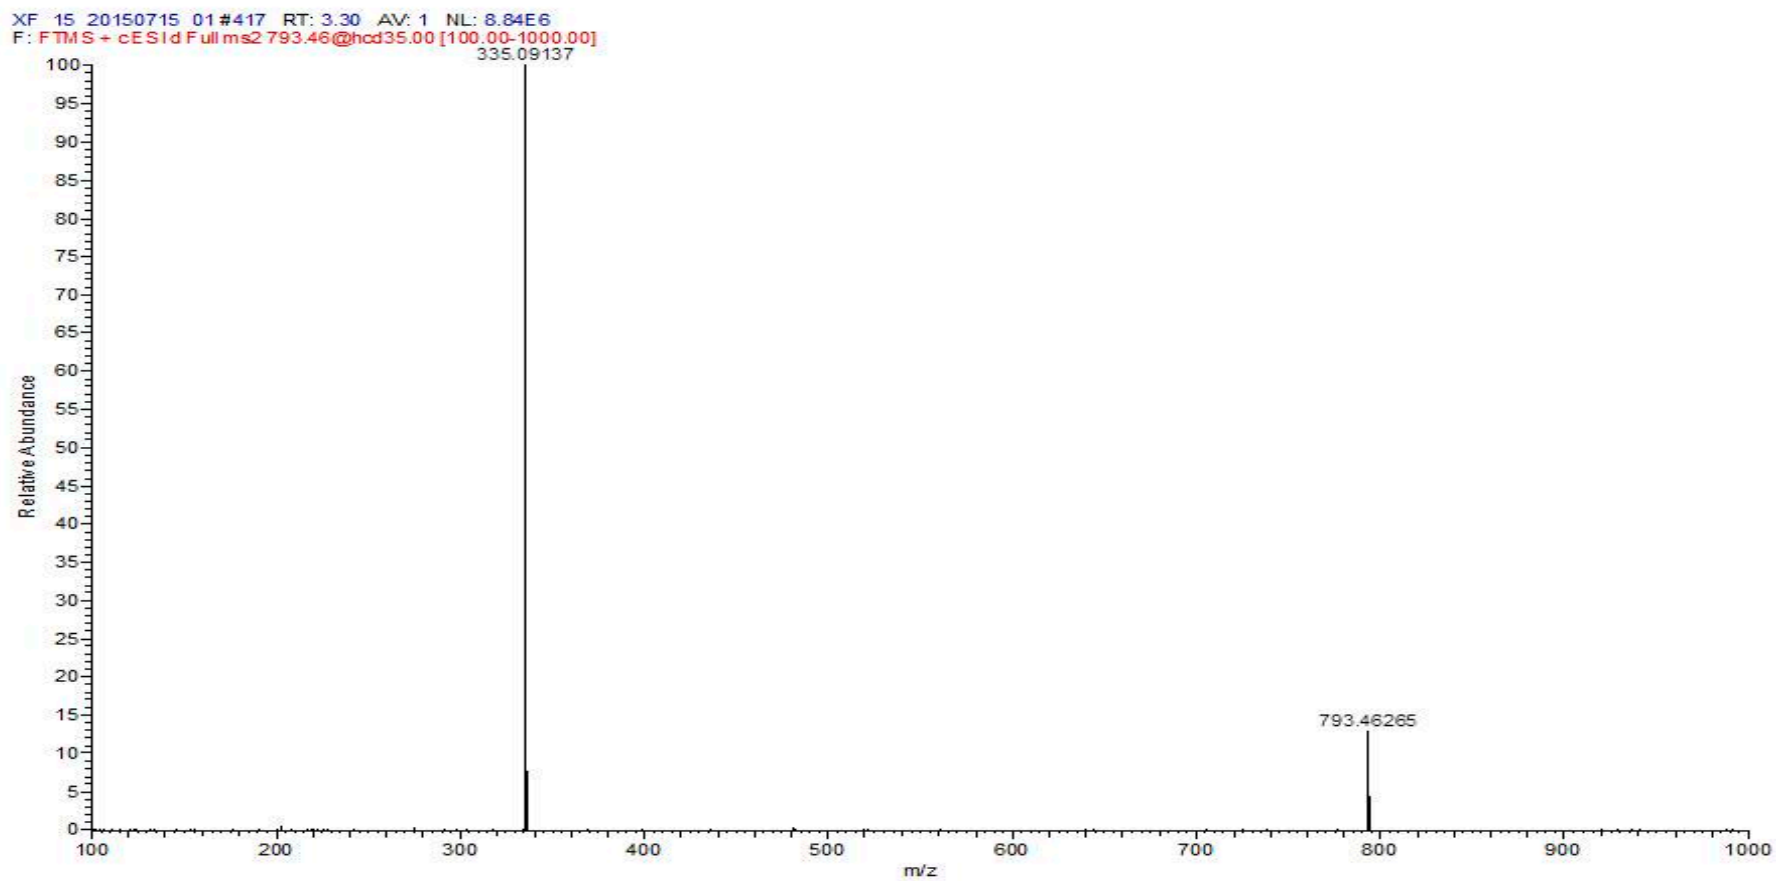

Figure S12. MS spectrum of ginsenoside F5.

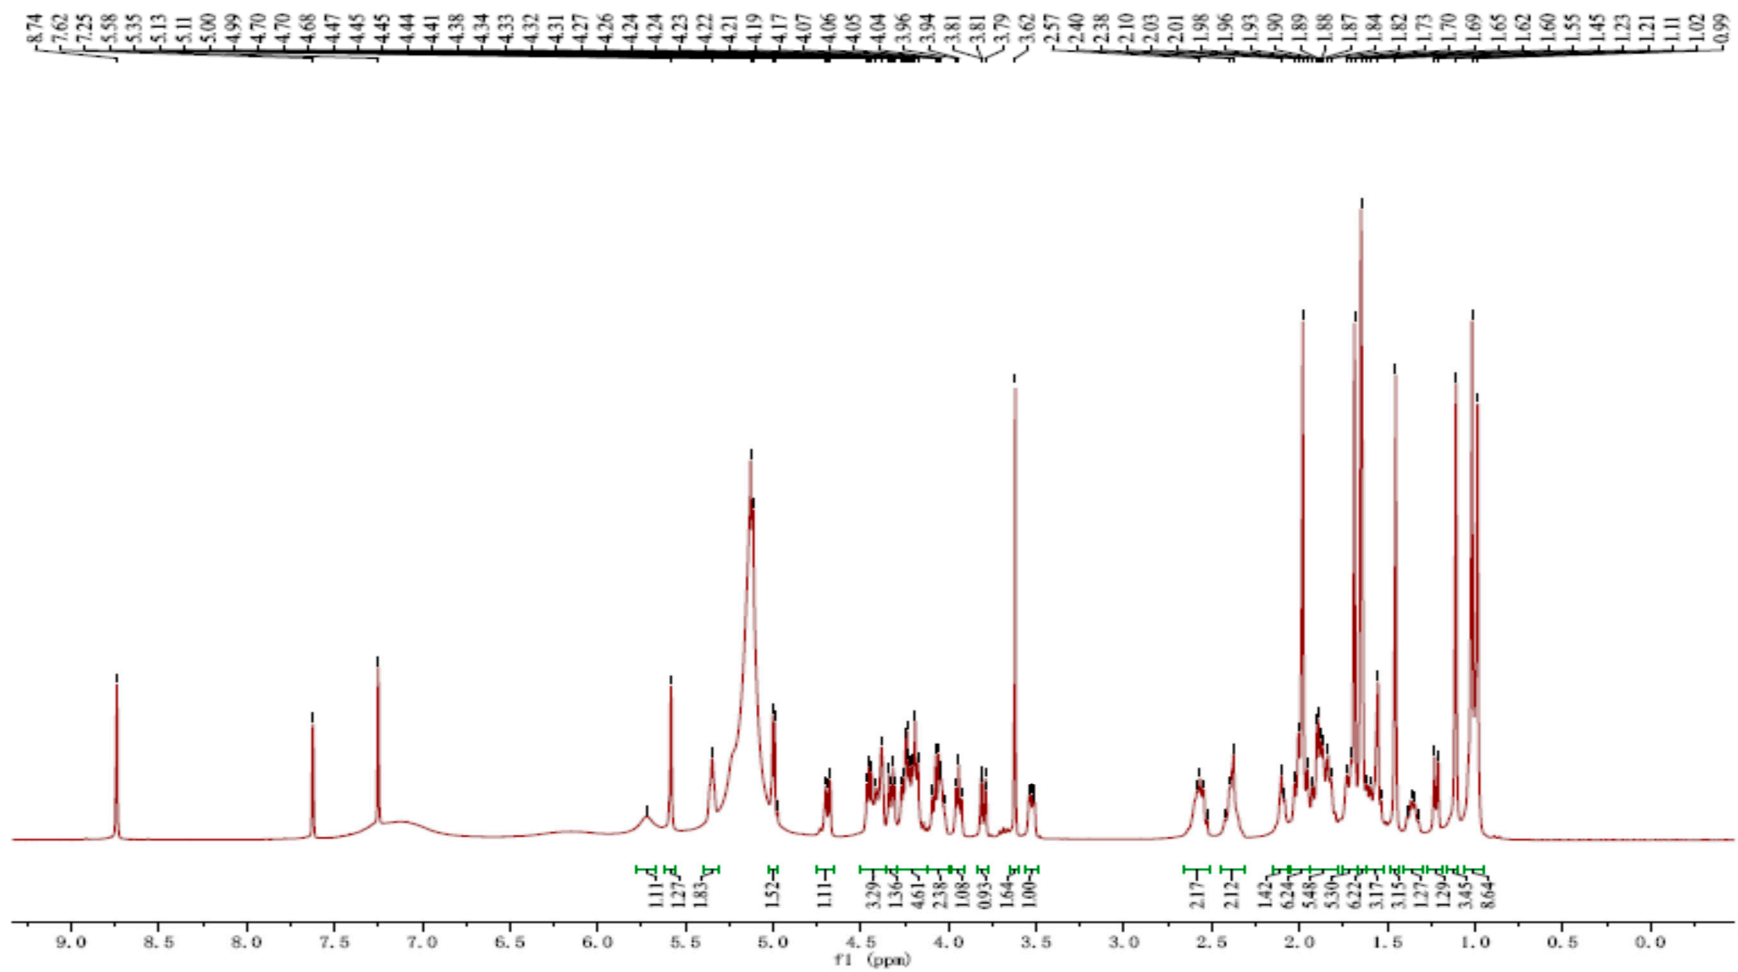

Figure S13.  $^1\text{H}$ -NMR spectrum of ginsenoside  $\text{F}_3$  in pyridine- $d_5$ .



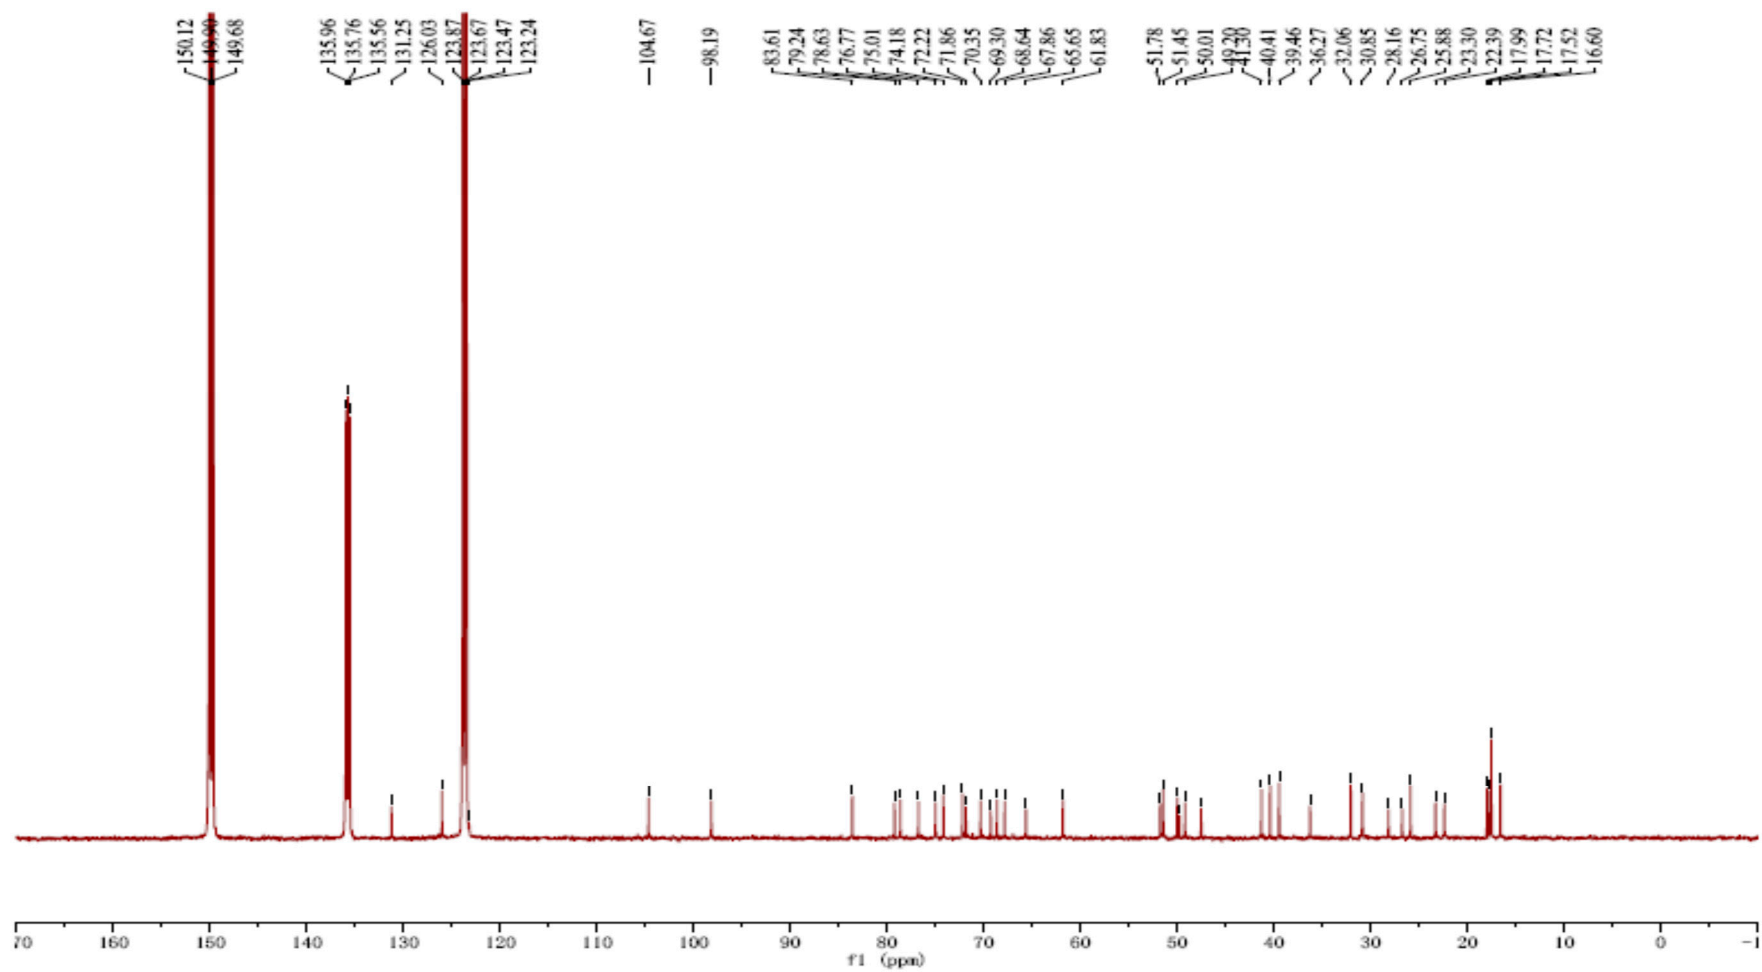

Figure S14.  $^{13}\text{C}$ -NMR spectrum of ginsenoside  $\text{F}_3$  in  $\text{pyridine-}d_5$ .

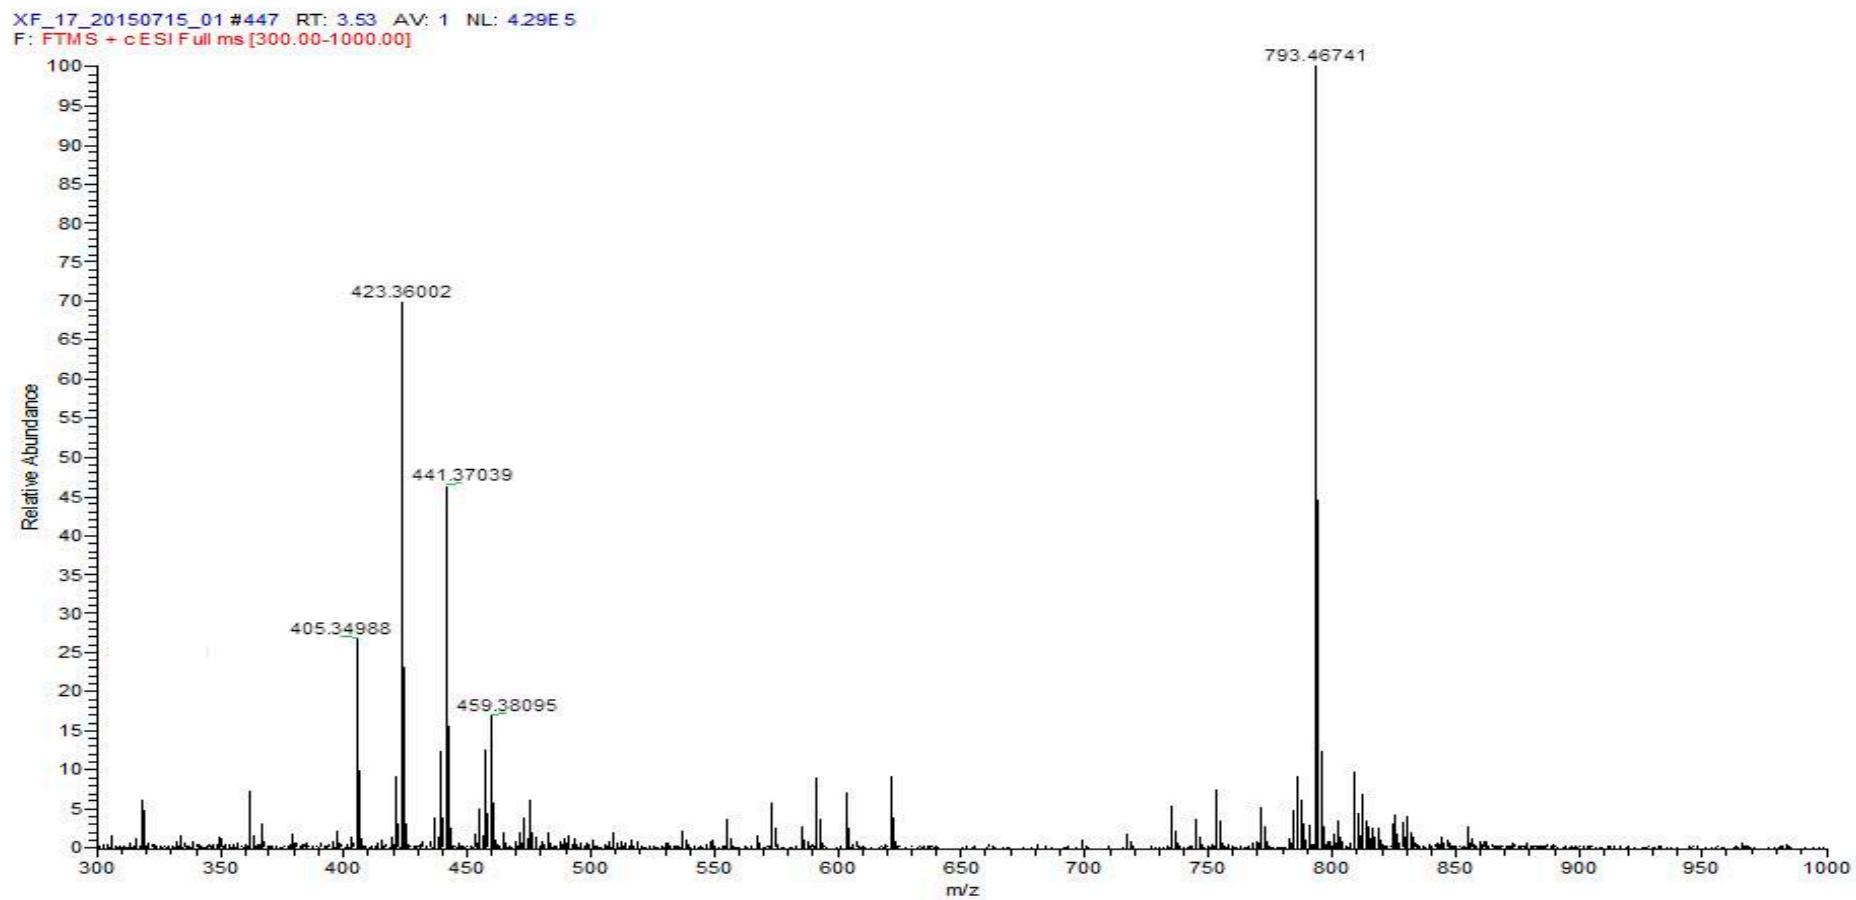

Figure S15. MS spectrum of ginsenoside F<sub>3</sub>.

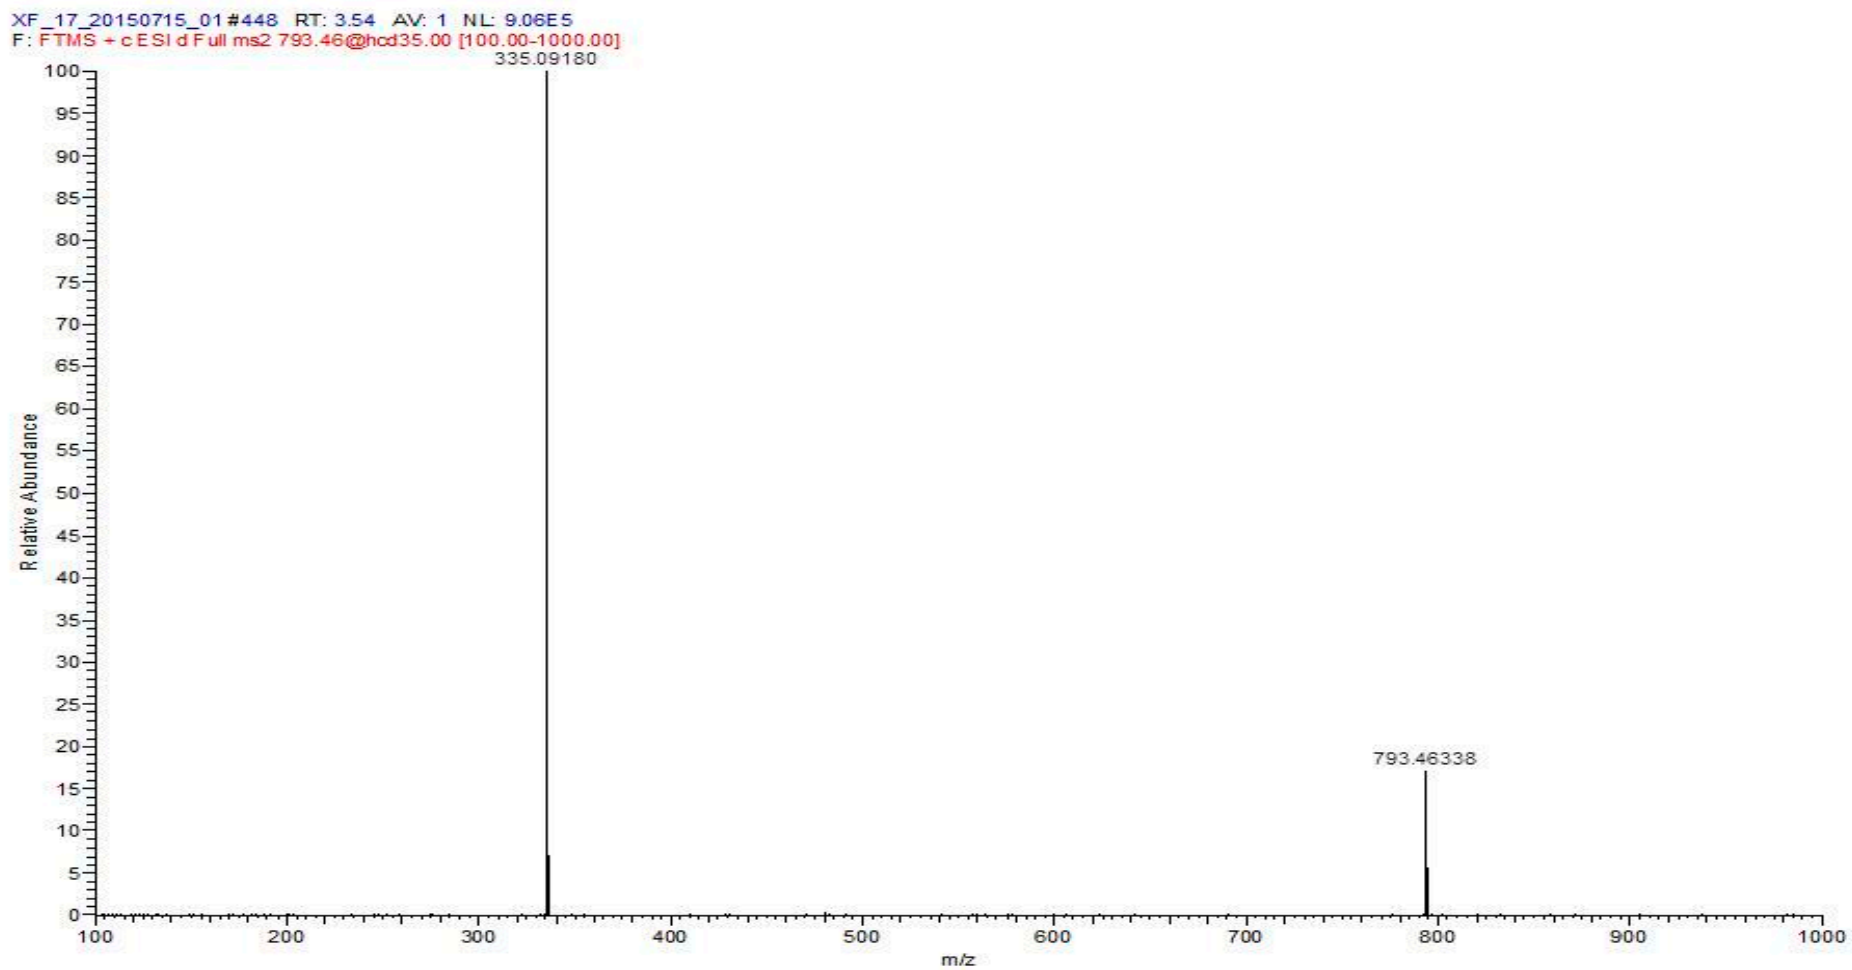

Figure S16. MS spectrum of ginsenoside F3.
